# Supplementary material for: Sb4O5Cl2 embedded in carbon polyhedra for fast charge kinetics towards high-capacity Li-ion capacitors
Source: Royal Society of Chemistry journal article supplement (doi:10.1039/d4ta07237e), 2024-12-06
Supplement: d4ta07237e1.pdf [file d4ta07237e1.pdf]

## Electronic Supplementary Information

---

### **Sb<sub>4</sub>O<sub>5</sub>Cl<sub>2</sub> Embedded in Carbon Polyhedra For Fast Charge Kinetics Towards High-Capacity Lithium-ion Capacitors**

Meng Wang,<sup>ab</sup> Kewei Liu,<sup>ac</sup> Yanan Xu,<sup>ac</sup> Xudong Zhang,<sup>ac</sup> Qifan Peng,<sup>a</sup> Yang Guo,<sup>a</sup> Xiong  
Zhang,<sup>ac</sup> Xianzhong Sun,<sup>ac</sup> Weiwei Pang,<sup>\*c</sup> Kai Wang,<sup>\*ac</sup> Le Yu,<sup>\*b</sup> Yanwei Ma<sup>\*acd</sup>

*<sup>a</sup>Institute of Electrical Engineering, Chinese Academy of Sciences*

*Beijing 100190, P. R. China*

*E-mail: wangkai@mail.iee.ac.cn; ywma@mail.iee.ac.cn*

*<sup>b</sup>State Key Lab of Organic-Inorganic Composites, Beijing University of Chemical Technology,*

*Beijing, 100029, P. R. China*

*E-mail: yule@mail.buct.edu.cn*

*<sup>c</sup>School of Engineering Sciences, University of Chinese Academy of Sciences*

*Beijing 100049, P. R. China*

*<sup>d</sup>School of Materials Science and Engineering, Zhengzhou University*

*Zhengzhou 450001, P. R. China*

*<sup>e</sup>Petrochemical Research Institute, PetroChina Company Limited, Beijing 102206, P. R. China*

*E-mail: pangweiwei@petrochina.com.cn*

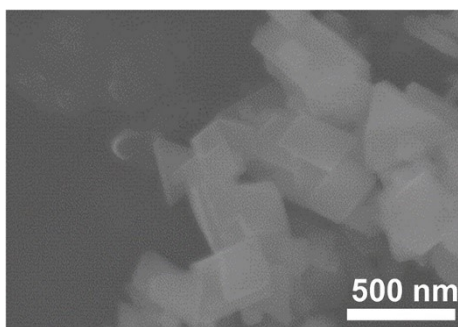

**Fig. S1** Field-emission scanning electron microscopy (FESEM) image of  $\text{Sb}_4\text{O}_5\text{Cl}_2$ .

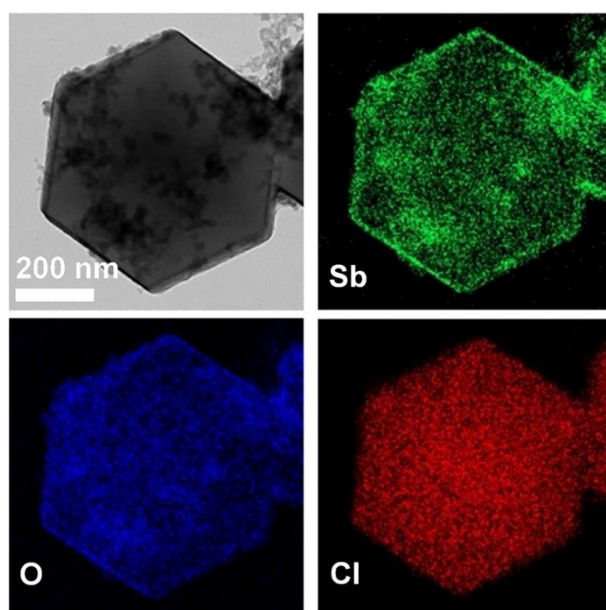

**Fig. S2** Transmission electron microscopy and the corresponding elemental mapping images of  $\text{Sb}_4\text{O}_5\text{Cl}_2@ZCP$ .

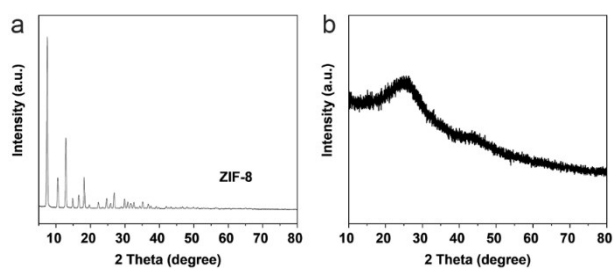

**Fig. S3** X-ray diffraction (XRD) patterns of (a) ZIF-8 and (b) ZCP.

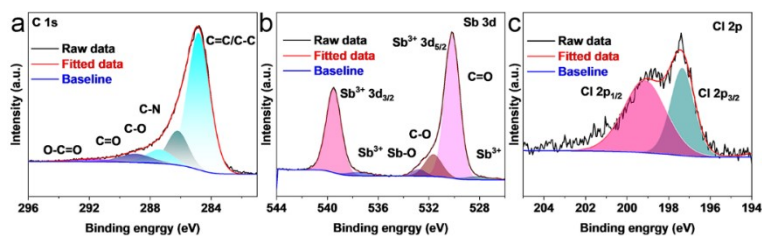

**Fig. S4** (a) C 1s XPS spectrum, (b) Sb 3d XPS spectrum, and (c) Cl 2p XPS spectrum of  $\text{Sb}_4\text{O}_5\text{Cl}_2@\text{ZCP}$ .

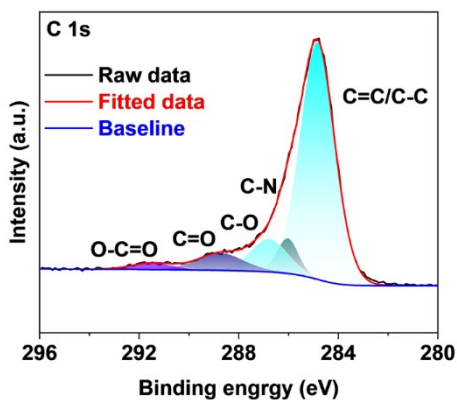

**Fig. S5** C 1s XPS spectrum of ZCP.

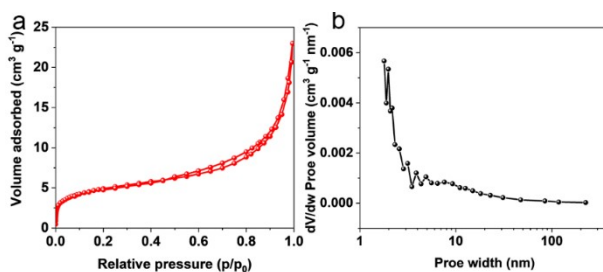

**Fig. S6** (a)  $\text{N}_2$  adsorption-desorption isotherms, and (b) pore size distribution curve of  $\text{Sb}_4\text{O}_5\text{Cl}_2@\text{ZCP}$ .

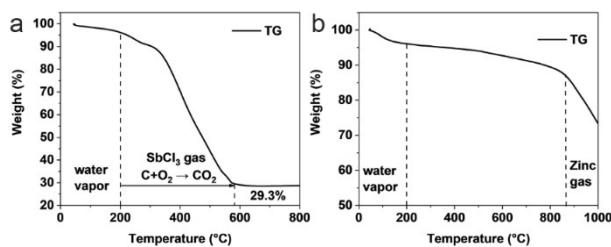

**Fig. S7** Thermogravimetry curves of (a)  $\text{Sb}_4\text{O}_5\text{Cl}_2@\text{ZCP}$  in air and (b) ZCP in  $\text{N}_2$ .

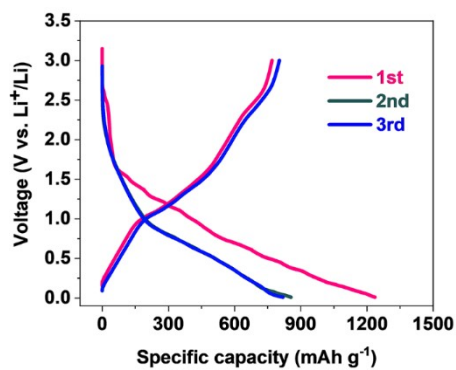

**Fig. S8** Galvanostatic charge-discharge (GCD) profiles of the initial 3 cycles at 0.1 A g<sup>-1</sup> for Sb<sub>4</sub>O<sub>5</sub>Cl<sub>2</sub>@ZCP.

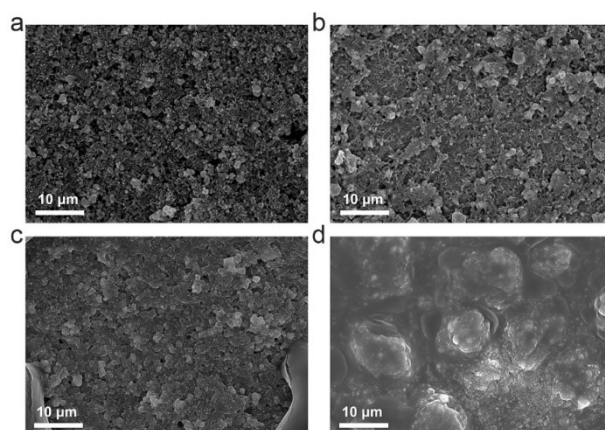

**Fig. S9** FESEM images of (a,c) Sb<sub>4</sub>O<sub>5</sub>Cl<sub>2</sub> and (b,d) Sb<sub>4</sub>O<sub>5</sub>Cl<sub>2</sub>@ZCP anodes (a,b) before and (c,d) after cycling.

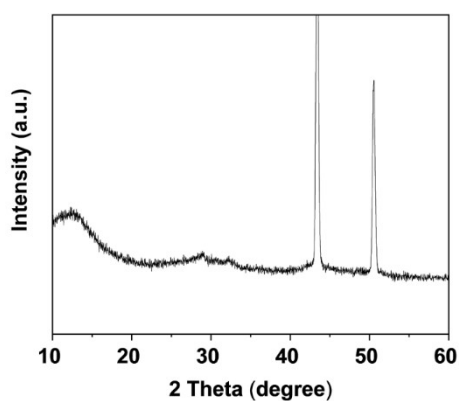

**Fig. S10** XRD pattern of Sb<sub>4</sub>O<sub>5</sub>Cl<sub>2</sub>@ZCP after cycling.

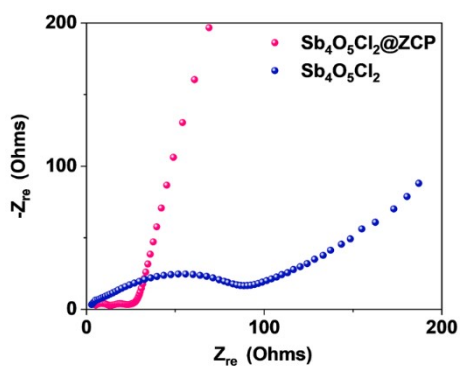

**Fig. S11** Nyquist plots of  $\text{Sb}_4\text{O}_5\text{Cl}_2@\text{ZCP}$  and  $\text{Sb}_4\text{O}_5\text{Cl}_2$  electrodes.

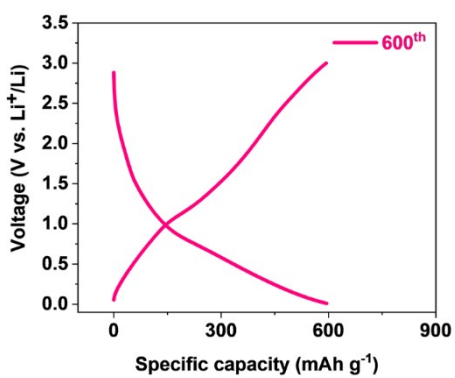

**Fig. S12** GCD profiles of the  $\text{Sb}_4\text{O}_5\text{Cl}_2@\text{ZCP}$  after long-term cycling.

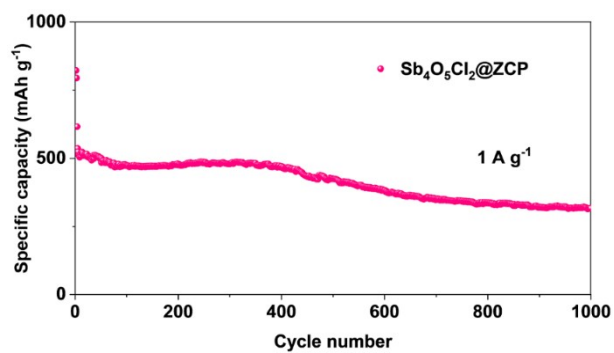

**Fig. S13** Cycling performance of  $\text{Sb}_4\text{O}_5\text{Cl}_2@\text{ZCP}$ .

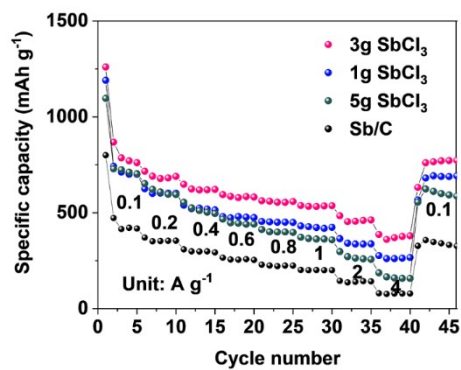

**Fig. S14** Rate performance of Sb/C and  $\text{Sb}_4\text{O}_5\text{Cl}_2@\text{ZCPs}$  using different amounts of  $\text{SbCl}_3$ .

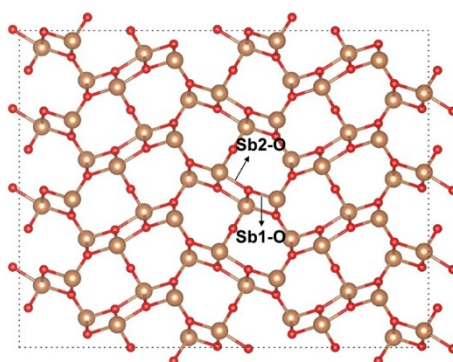

**Fig. S15** Sb1-O and Sb2-O coordination bonds in  $\text{Sb}_4\text{O}_5\text{Cl}_2$ .

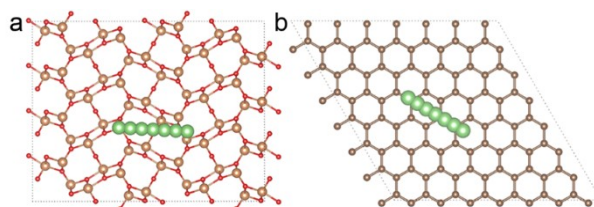

**Fig. S16**  $\text{Li}^+$  migration paths in the surfaces of (a)  $\text{Sb}_4\text{O}_5\text{Cl}_2$  and (b) ZCP.

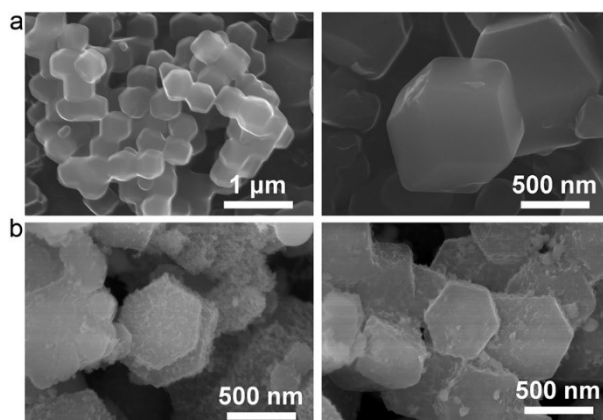

**Fig. S17** FESEM images of (a)  $\text{Sb}_3\text{O}_2\text{F}_5@\text{ZCP}$  and (b)  $\text{SbOBr}@\text{ZCP}$ .

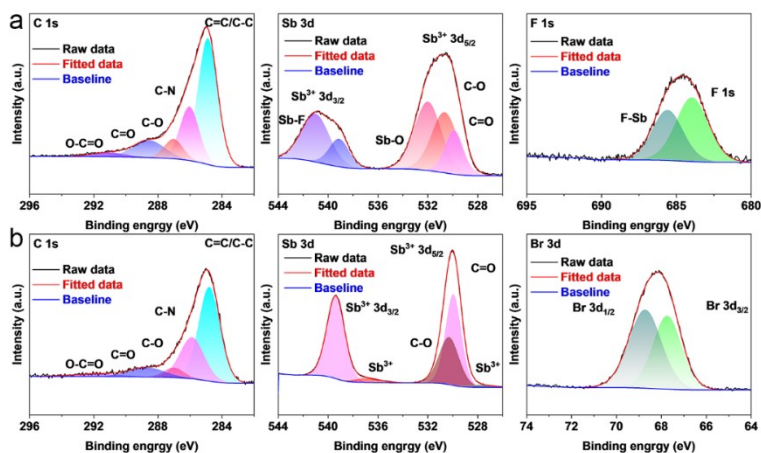

Fig. S18 XPS spectra of (a)  $\text{Sb}_3\text{O}_2\text{F}_5@\text{ZCP}$  and (b)  $\text{SbOBr}@\text{ZCP}$ .

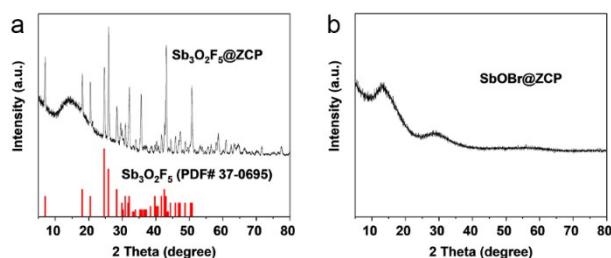

Fig. S19 XRD patterns of (a)  $\text{Sb}_3\text{O}_2\text{F}_5@\text{ZCP}$ , and (b)  $\text{SbOBr}@\text{ZCP}$ .

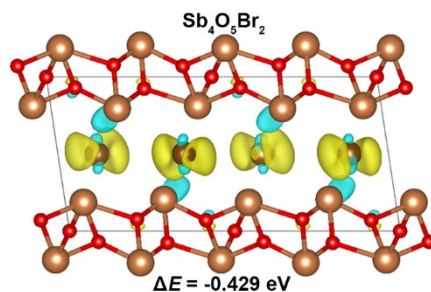

Fig. S20 Electron density differences of  $\text{Sb}_4\text{O}_5\text{Br}_2$ .

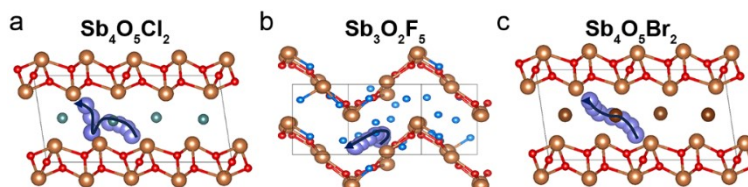

Fig. S21  $\text{Li}^+$  migration paths in the interlayers of (a)  $\text{Sb}_4\text{O}_5\text{Cl}_2$ , (b)  $\text{Sb}_3\text{O}_2\text{F}_5$  and (c)  $\text{Sb}_4\text{O}_5\text{Br}_2$ .

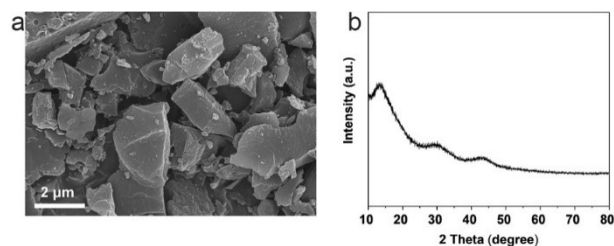

**Fig. S22** FESEM image and XRD pattern of YP-80F.

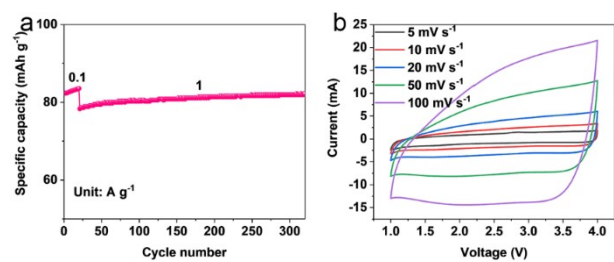

**Fig. S23** (a) Cycling performance and (b) CV curves of YP-80F cathode.

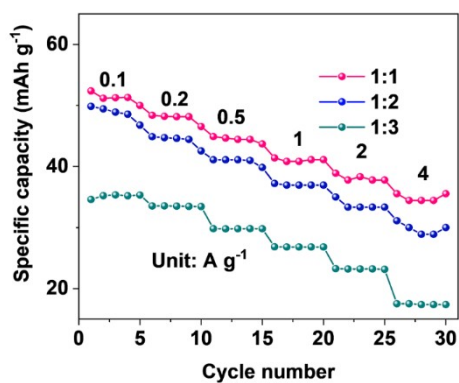

**Fig. S24** Rate performance of different mass ratios of cathode and anode in a LIC device.



**Table S1** Elemental contents in ZCP and  $\text{Sb}_4\text{O}_5\text{Cl}_2@\text{ZCP}$  determined by XPS.

| <b>Sample</b>                                 | <b>Atomic concentration (at.%)</b> |          |           |           |
|-----------------------------------------------|------------------------------------|----------|-----------|-----------|
|                                               | <b>C</b>                           | <b>O</b> | <b>Zn</b> | <b>Sb</b> |
| ZCP                                           | 79.43                              | 15.97    | 4.59      | /         |
| $\text{Sb}_4\text{O}_5\text{Cl}_2@\text{ZCP}$ | 40.51                              | 49.5     | 2.8       | 7.19      |

**Table S2** ICP results of  $\text{Sb}_4\text{O}_5\text{Cl}_2@\text{ZCP}$  sample.

| <b>Sample</b>                                 | <b>Sb (wt%)</b> | <b>Zn (wt%)</b> |
|-----------------------------------------------|-----------------|-----------------|
| $\text{Sb}_4\text{O}_5\text{Cl}_2@\text{ZCP}$ | 9.4             | 3.65            |

**Table S3** Comparison table of Sb<sub>4</sub>O<sub>5</sub>Cl<sub>2</sub>@ZCP with other Sb-based anodes.

| <b>Anode</b>                                        | <b>Performance</b>                                                  | <b>Ref.</b> |
|-----------------------------------------------------|---------------------------------------------------------------------|-------------|
| Sb <sub>4</sub> O <sub>5</sub> Cl <sub>2</sub> @ZCP | 601.1 mAh g <sup>-1</sup> at 0.5 A g <sup>-1</sup> after 600 cycles | This work   |
| BiSbSe <sub>3</sub>                                 | 428 mAh g <sup>-1</sup> at 0.1 A g <sup>-1</sup> after 100 cycles   | 1           |
| Sb@Ni <sub>3</sub> (HHTP) <sub>2</sub> -10          | 590 mAh g <sup>-1</sup> at 0.1 A g <sup>-1</sup> after 100 cycles   | 2           |
| Sb nanoflakes                                       | 300 mAh g <sup>-1</sup> at 0.5 A g <sup>-1</sup> after 80 cycles    | 3           |
| SS/H@C                                              | 624.5 mAh g <sup>-1</sup> at 10 A g <sup>-1</sup> after 100 cycles  | 4           |
| YS-SbC                                              | 584 mAh g <sup>-1</sup> at 0.2 A g <sup>-1</sup> after 100 cycles   | 5           |
| Sb <sub>30</sub> P <sub>30</sub>                    | 807 mAh g <sup>-1</sup> at 5 A g <sup>-1</sup> after 200 cycles     | 6           |
| SnSb@CNF/CFT                                        | 208 mAh g <sup>-1</sup> at 0.5 A g <sup>-1</sup> after 700 cycles   | 7           |
| Sb@B_MX_HF5 (6:4)                                   | 434 mAh g <sup>-1</sup> at 0.1 A g <sup>-1</sup> after 100 cycles   | 8           |
| NC@SnSb@NC                                          | 598 mAh g <sup>-1</sup> at 0.5 A g <sup>-1</sup> after 100 cycles   | 9           |
| SZS-Sisal                                           | 638 mAh g <sup>-1</sup> at 0.5 A g <sup>-1</sup> after 100 cycles   | 10          |
| Sb <sub>2</sub> S <sub>3</sub> @C                   | 450 mAh g <sup>-1</sup> at 0.5 A g <sup>-1</sup> after 70 cycles    | 11          |
| Co-Sb-S@NC                                          | 884.9 mAh g <sup>-1</sup> at 1 A g <sup>-1</sup> after 400 cycles   | 12          |

## Supplementary References

1. W.-C. Lin, Y.-C. Yang and H.-Y. Tuan, *Energy Storage Mater.*, 2022, **51**, 38-53.
2. A. Nazir, H. T. T. Le, A.-G. Nguyen, J. Kim and C.-J. Park, *Chem. Eng. J.*, 2022, **450**, 138408.
3. R. Shao, Z. Sun, L. Wang, J. Pan, L. Yi, Y. Zhang, J. Han, Z. Yao, J. Li, Z. Wen, S. Chen, S. Chou, D.-L. Peng and Q. Zhang, *Angew. Chem., Int. Ed.*, 2024, **63**, e202320183.
4. W. Zhao, S. Yuan, S. Lei, Z. Zeng, J. Dong, F. Jiang, Y. Yang, W. Sun, X. Ji and P. Ge, *Adv. Funct. Mater.*, 2022, **33**, 2211542.
5. X. Yang, Y. Zhu, D. Wu, M. Li, Y. He, L. Huang and M. Gu, *Adv. Funct. Mater.*, 2022, **32**, 2111391.
6. Y. Wei, J. He, J. Zhang, M. Ou, Y. Guo, J. Chen, C. Zeng, J. Xu, J. Han, T. Zhai and H. Li, *Energy Environ. Mater.*, 2022, **6**, e12336.
7. Z. Song, G. Wang, Y. Chen, Y. Lu and Z. Wen, *Chem. Eng. J.*, 2023, **463**, 142289.
8. S. Arnold, A. Gentile, Y. Li, Q. Wang, S. Marchionna, R. Ruffo and V. Presser, *J. Mater. Chem. A*, 2022, **10**, 10569-10585.
9. X. Shi, W. Liu, D. Zhang, C. Wang, J. Zhao, X. Wang, B. Chen, L. Chang, Y. Cheng and L. Wang, *Chem. Eng. J.*, 2022, **431**, 134318.
10. H. Qin, B. Zhang, C. Wang, D. Wang and X. Ou, *Energy Storage Mater.*, 2022, **52**, 189-200.
11. H. Ye, Z. Wang, J. Yan, Z. Wang, J. Chen, Q. Dai, Y. Su, B. Guo, H. Li, L. Geng, C. Du, J. Wang, Y. Tang, L. Zhang, L. Zhu and J. Huang, *Adv. Funct. Mater.*, 2022, **32**, 2204231.
12. T. Yan, F. Wen, J. Duan, C. Zhu, J. Wen, Y. Wang, J. Tong and Z. Chen, *Chem. Eng. J.*, 2023, **474**, 145839.
